# Supplementary material for: Trust, Interaction with Neighbors, and Vaccination during the COVID-19 Pandemic: A Cross-Sectional Analysis of Chinese Data
Source: MDPI journal article supplement (doi:10.3390/vaccines11081332), 2023-08-06
Supplement: s1 [file s1]

**Table S1. Estimated results of multilevel fixed-effects models<sup>a</sup> ( $N = 6,860$ )**

[illegible]

|                                       |        |                  |        |                  |        |                  |
|---------------------------------------|--------|------------------|--------|------------------|--------|------------------|
| Farming                               | 0.020  | (-0.018, 0.058)  | -0.018 | (-0.042, 0.006)  | 0.012  | (-0.024, 0.048)  |
| Government-related work <sup>b</sup>  | 0.051  | (0.008, 0.094)   | 0.001  | (-0.026, 0.028)  | -0.049 | (-0.090, -0.009) |
| Private or foreign company            | 0.046  | (0.006, 0.086)   | -0.008 | (-0.033, 0.017)  | -0.067 | (-0.105, -0.030) |
| Self-employed                         | 0.008  | (-0.031, 0.047)  | -0.007 | (-0.032, 0.017)  | -0.080 | (-0.117, -0.043) |
| Other                                 | 0.070  | (-0.012, 0.152)  | -0.025 | (-0.077, 0.026)  | -0.030 | (-0.108, 0.048)  |
| Family income (ref. = Lowest tertile) |        |                  |        |                  |        |                  |
| Second tertile                        | 0.030  | (-0.003, 0.063)  | 0.020  | (0.000, 0.041)   | 0.015  | (-0.016, 0.046)  |
| Highest tertile                       | 0.051  | (0.013, 0.089)   | 0.025  | (0.002, 0.049)   | 0.029  | (-0.007, 0.065)  |
| Unanswered                            | -0.040 | (-0.076, -0.004) | -0.024 | (-0.046, -0.001) | 0.006  | (-0.028, 0.040)  |
| Poor self-rated health                | -0.068 | (-0.102, -0.035) | -0.032 | (-0.053, -0.011) | -0.038 | (-0.070, -0.006) |
| Agricultural <i>hukou</i>             | 0.002  | (-0.030, 0.034)  | 0.000  | (-0.020, 0.021)  | -0.019 | (-0.050, 0.011)  |
| Communist party member                | 0.075  | (0.042, 0.108)   | 0.001  | (-0.020, 0.022)  | -0.016 | (-0.048, 0.015)  |

<sup>a</sup> Further controlled for individual-, province- and community-level fixed effects.

<sup>b</sup> Encompassed works in 1) party and government institutions, 2) state-owned or collectively-owned enterprises, business groups, social groups, neighborhood or village committee, and 3) the army.

**Table S2. Estimated results of multilevel logistic models to explain the probability of vaccination**

|                                            | Young ( <i>N</i> = 4,859) |              | Old ( <i>N</i> = 2,001) |              |
|--------------------------------------------|---------------------------|--------------|-------------------------|--------------|
|                                            | OR                        | 95%CI        | OR                      | 95%CI        |
| General trust                              |                           |              |                         |              |
| Individual-level                           | 1.35                      | (1.07, 1.70) | 1.21                    | (0.90, 1.64) |
| Community-level                            | 1.58                      | (1.14, 2.18) | 1.17                    | (0.78, 1.75) |
| Female                                     | 0.54                      | (0.42, 0.68) | 0.91                    | (0.68, 1.21) |
| Age (ref. = < 30 years / < 70 years)       |                           |              |                         |              |
| 30-39 years                                | 1.19                      | (0.81, 1.76) |                         | -            |
| 40-49 years                                | 2.08                      | (1.33, 3.24) |                         | -            |
| 50-59 years                                | 1.74                      | (1.12, 2.70) |                         | -            |
| 60-69 years                                |                           | -            |                         | -            |
| 70-79 years                                |                           | -            | 0.51                    | (0.38, 0.69) |
| 80 years +                                 |                           | -            | 0.18                    | (0.11, 0.30) |
| Marital status (ref. = Married)            |                           |              |                         |              |
| Unmarried                                  | 1.52                      | (1.01, 2.29) | 0.43                    | (0.15, 1.27) |
| Divorced/separated                         | 0.69                      | (0.45, 1.04) | 0.81                    | (0.57, 1.16) |
| Living alone                               | 0.69                      | (0.48, 1.00) | 0.67                    | (0.45, 0.99) |
| Educational attainment (ref. = Illiterate) |                           |              |                         |              |
| Primary school                             | 1.27                      | (0.70, 2.29) | 0.97                    | (0.66, 1.43) |
| Junior high school                         | 1.47                      | (0.83, 2.60) | 1.05                    | (0.68, 1.62) |
| High school                                | 1.05                      | (0.58, 1.91) | 1.19                    | (0.72, 1.97) |

|                                                                 |      |              |      |              |
|-----------------------------------------------------------------|------|--------------|------|--------------|
| College or above                                                | 1.27 | (0.67, 2.42) | 1.13 | (0.51, 2.50) |
| Occupation type (ref. = No work)                                |      |              |      |              |
| Farming                                                         | 1.18 | (0.76, 1.83) | 0.91 | (0.62, 1.35) |
| Government-related work <sup>a</sup>                            | 3.62 | (2.27, 5.79) | 0.66 | (0.19, 2.32) |
| Private or foreign company                                      | 1.64 | (1.18, 2.28) | 1.50 | (0.51, 4.36) |
| Self-employed                                                   | 1.31 | (0.94, 1.83) | 0.94 | (0.44, 2.02) |
| Other                                                           | 1.23 | (0.60, 2.53) | 0.28 | (0.07, 1.10) |
| Family income (ref. = Lowest tertile)                           |      |              |      |              |
| Middle tertile                                                  | 0.74 | (0.51, 1.06) | 0.78 | (0.53, 1.15) |
| Highest tertile                                                 | 0.97 | (0.65, 1.44) | 0.67 | (0.42, 1.06) |
| Unanswered                                                      | 0.67 | (0.45, 0.99) | 0.94 | (0.64, 1.38) |
| Poor self-rated health                                          | 0.85 | (0.57, 1.25) | 0.53 | (0.39, 0.73) |
| Agricultural <i>hukou</i>                                       | 1.20 | (0.91, 1.57) | 1.34 | (0.91, 1.97) |
| Communist party member                                          | 1.77 | (1.23, 2.54) | 1.56 | (1.04, 2.35) |
| <hr/>                                                           |      |              |      |              |
| Infection per capita at the province level (ref. = Lowest)      |      |              |      |              |
| Middle                                                          | 1.00 | (0.66, 1.51) | 1.03 | (0.58, 1.83) |
| High                                                            | 0.87 | (0.40, 1.87) | 0.75 | (0.26, 2.15) |
| Vaccination rate at the province level) (ref. = Lowest tertile) |      |              |      |              |
| Middle tertile                                                  | 4.35 | (2.72, 6.96) | 2.26 | (1.16, 4.41) |
| Highest tertile                                                 | 7.55 | (4.79, 11.9) | 7.66 | (3.99, 14.7) |

<sup>a</sup> Encompassed works in 1) party and government institutions, 2) state-owned or collectively-owned enterprises, business groups, social groups, neighborhood or village committee, and 3) the army.
